# Supplementary material for: Hierarchical foam of exposed ultrathin nickel nanosheets supported on chainlike Ni-nanowires and the derivative chalcogenide for enhanced pseudocapacitance
Source: Royal Society of Chemistry journal article supplement (doi:10.1039/c3nr06031d), 2013-12-12
Supplement: c3nr06031d.pdf [file c3nr06031d.pdf]

## Supporting Information

---

### **Hierarchical Foam of Exposed Ultrathin Nickel Nanosheets Supported on Chainlike Ni-Nanowires and the Derivative Chalcogenide for Enhanced Pseudocapacitance**

*Wei Ni,\* Bin Wang, Jianli Cheng, Xiaodong Li, Qun Guan, Guifang Gu, and Ling Huang*

<sup>a</sup> *Institute of Chemical Materials, China Academy of Engineering Physics (CAEP), Mianyang 621900, China. Fax: +86 816-2544426; E-mail: [niwei@iccas.ac.cn](mailto:niwei@iccas.ac.cn)*

<sup>b</sup> *Sichuan Research Center of New Materials, Mianyang 621000, China*

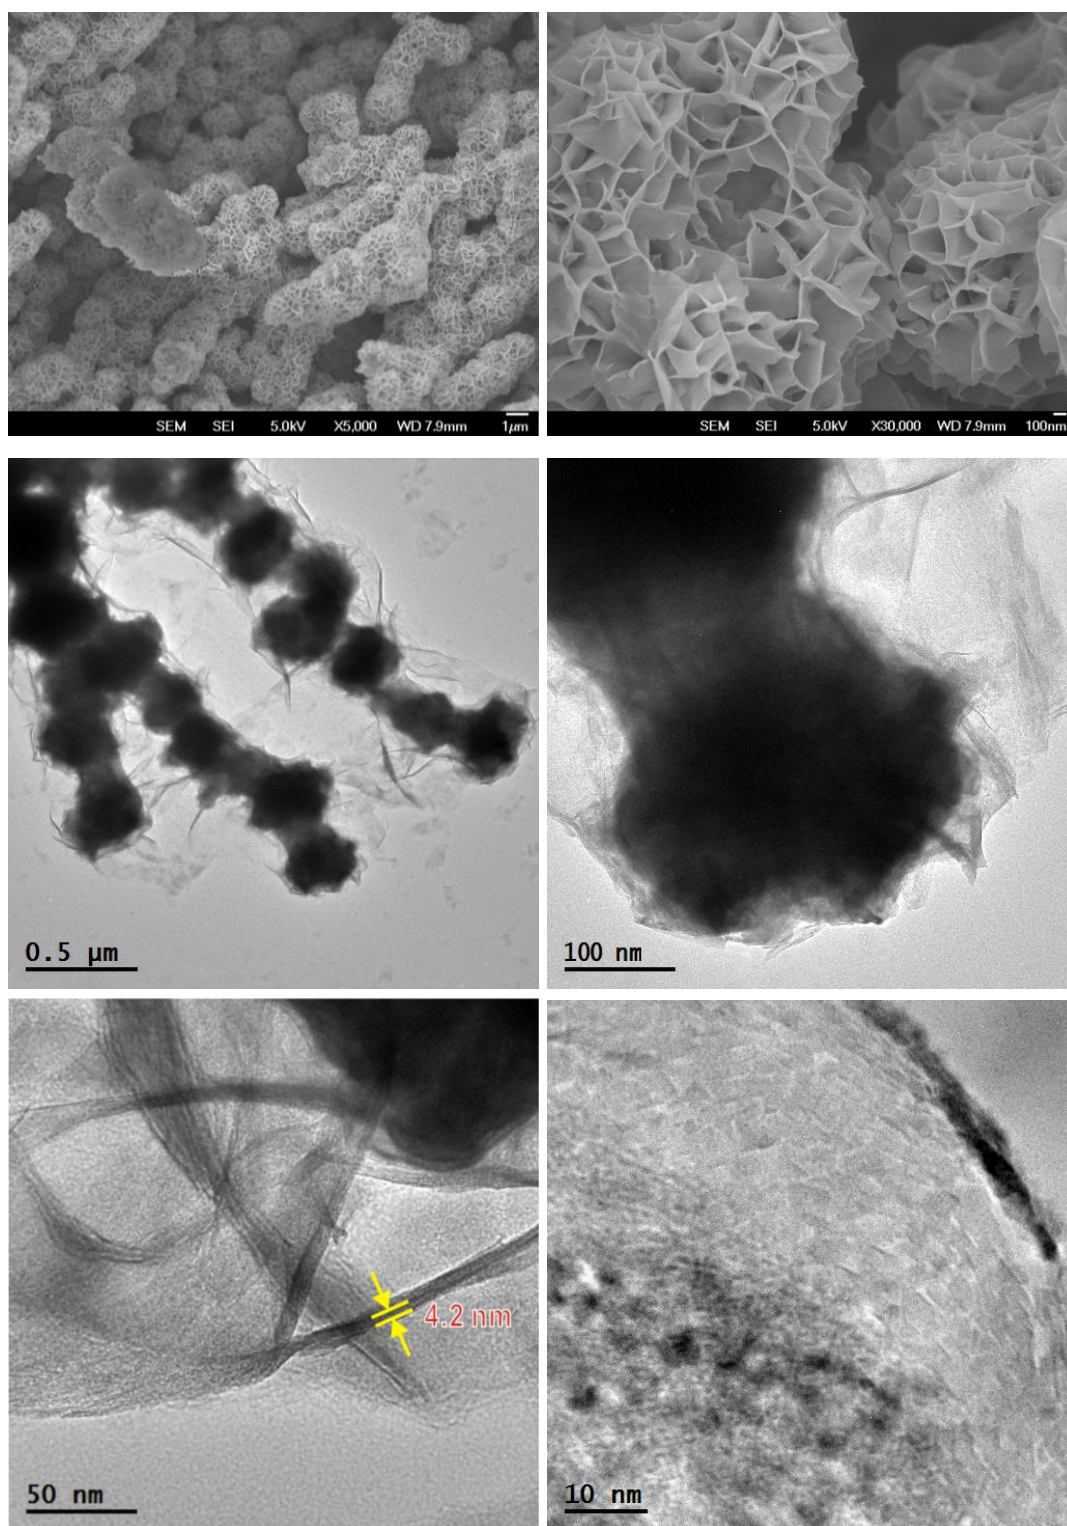

**Figure S1.** The complementary TEM photos of Ni nanofoam with altered nucleation and growth rate. And some Ni lamellae (with visibly exposed sharp edge directly facing the viewer) are even thinner than 5 nm.

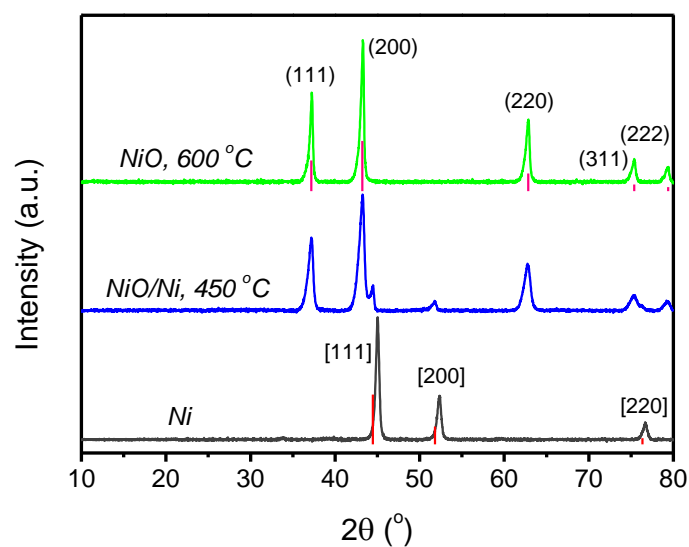

**Figure S2.** The evolution of XRD spectra of the Ni nanofoam under air annealing.

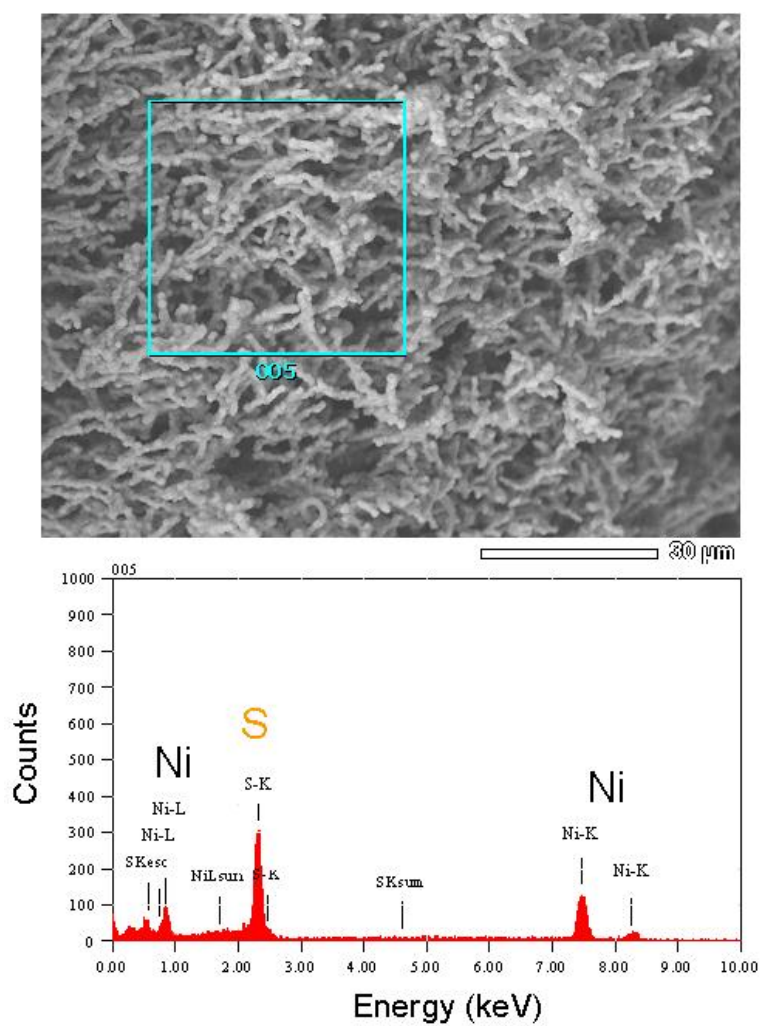

**Figure S3** Energy dispersive X-ray spectrum (EDS) of the nanostructured  $\text{NiS}_2$ .

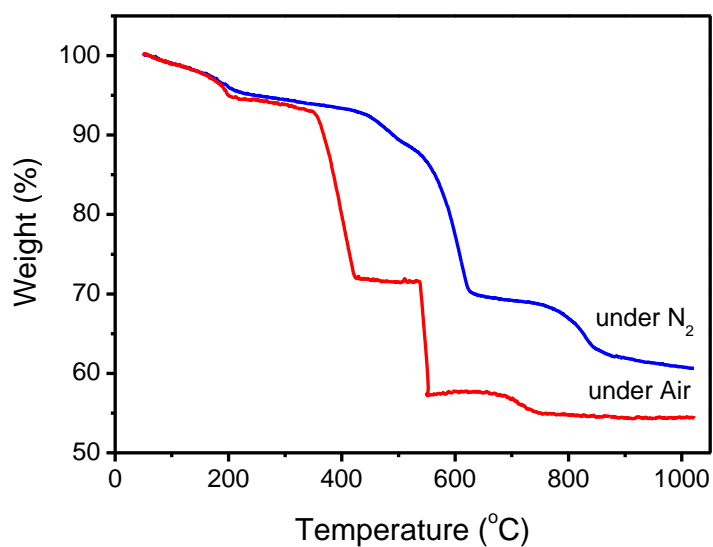

**Figure S4.** TGA curves of the as-prepared NiS<sub>2</sub> (300 °C sulfidation sample) in N<sub>2</sub> and air atmospheres, respectively. Desulfurization process by thermal decomposition occurs under a nitrogen atmosphere, and an oxidative desulfurization process under air calcination.

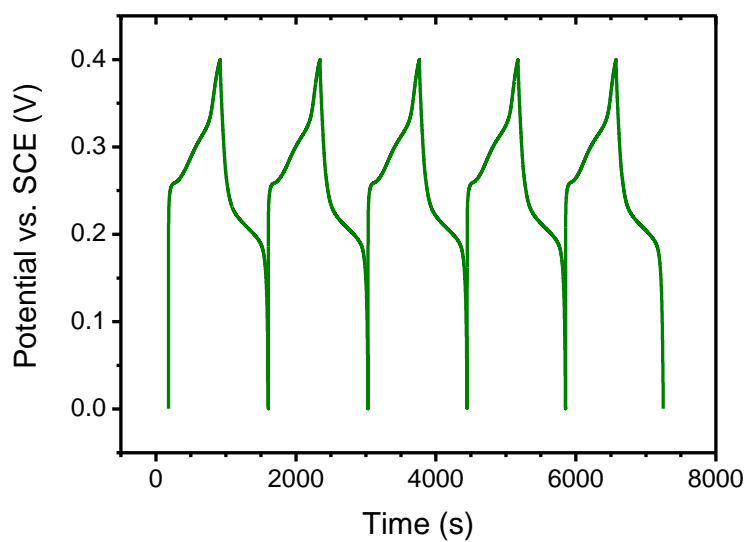

**Figure S5.** The charge/discharge curves of NiS<sub>2</sub> at a current density of 1 A g<sup>-1</sup>.

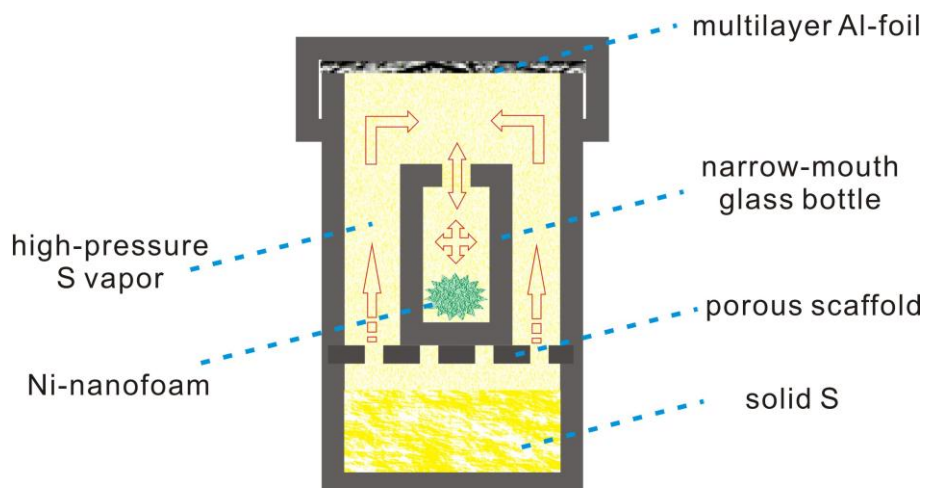

**Figure S6.** A sketch of the tailor-made steel autoclave for high-pressure sulfidation of e.g. the as-synthesized Ni-nanofoam. An enough amount of sublimed sulfur powder (i.e. 2-3 g) is deposited in the bottom of a 25-mL steel autoclave, the Ni-nanofoam with volume of 1-2 cm<sup>3</sup> contained in a narrow-mouth glass bottle is located on a porous steel scaffold in the autoclave, then a soft folded Al-foil is pressed and tightly sealed as a gasket. After transferred into a program-controlled muffle furnace, the high-pressure sulfur vapor forms [Ref 1,2] and the sulfidation of metals happens. One of the advantages is that it offers smaller sulfur molecules [Ref 3] and higher rate of diffusion and thus a more effective reaction process, yet with no sulfur residue on the product surface.

[1] B. Meyer. 'Elemental Sulfur,' *Chem. Rev.*, **1976**, 76, 367-388.

[2] W. A. West, A. W. C. Menzies. 'The Vapor Pressures of Sulphur between 100° and 550° with related Thermal Data,' *J. Phys. Chem.*, **1928**, 33, 1880-1892.

[3] S. Xin, L. Gu, N.-H. Zhao, Y.-X. Yin, L.-J. Zhou, Y.-G. Guo, L.-J. Wan. 'Smaller Sulfur Molecules Promise Better Lithium-Sulfur Batteries,' *J. Am. Chem. Soc.*, **2012**, 134, 18510-18513.

### S1. Crystallographic Structures

**Ni:** face-centered cubic (fcc) structure (Nickel, syn, JCPDS card no. 04-0850, *Fm-3m* (225),  $a_0=b_0=c_0=3.524$  Å).

**NiO:** cubic structure (Bunsenite, syn, JCPDS card no. 47-1049, *Fm-3m* (225),  $a_0=b_0=c_0=4.177$  Å).

**NiS<sub>2</sub>:** cubic structure (Vaesite, JCPDS card no. 11-0099, *Pa-3* (205),  $a_0=b_0=c_0=5.670$  Å)

Data based on *ICDD/JCPDS PDF Retrievals [Level-1 PDF, Sets 1-51 (04/25/07)]*

### S2. Reference on 'Vaesite (NiS<sub>2</sub>)'

Kerr, P. F. (1945) Cattierite and vaesite: new Co–Ni minerals from the Belgian Congo. *Amer. Mineral.*, 30, 483-497.

([http://www.minsocam.org/ammin/AM30/AM30\\_483.pdf](http://www.minsocam.org/ammin/AM30/AM30_483.pdf))

Vaesite NiS<sub>2</sub>, © 2001-2005 Mineral Data Publishing, version 1 (<http://rruff.info/doclib/hom/vaesite.pdf>)

Vaesite Mineral Data (<http://webmineral.com/data/Vaesite.shtml>)

Vaesite mineral information and data (<http://www.mindat.org/min-4133.html>)

*Last accessed on 03/12/1013*

### S3. Extended Reading Interests

Metal Aerogels (<http://www.aerogel.org/?p=932>)

Metal Oxide Aerogels (<http://www.aerogel.org/?p=44>)

Semiconducting Metal Chalcogenide Aerogels (<http://www.aerogel.org/?p=560>)

*Last accessed on 05/12/1013*
